# Supplementary material
Source: PubMed Central journal article supplement (PMC3126404)
Supplement: supp_77_9_2943__1.pdf [file supp_77_9_2943__1.pdf]

# Supplementary Fig 1. Optimization of several steps involved to remove microbes from stainless steel

**Deposition**  
Manual vs. Automatic

Manual deposition was found to be satisfactory compared to automated deposition.

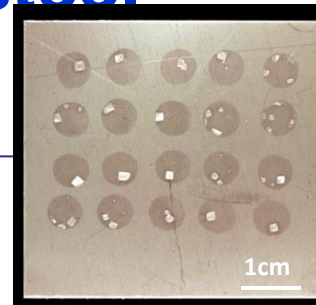

Manual

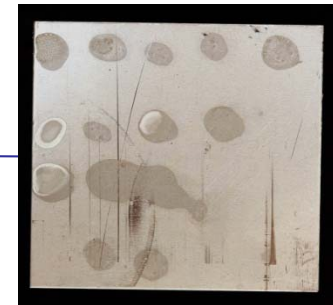

Automatic

**Suspension fluid**  
PBS vs. Water

Model microbial communities prepared in water produced a uniform layer on metal surface. PBS buffer yielded salt crystals after drying, which poses problems for the recovery of microbes.

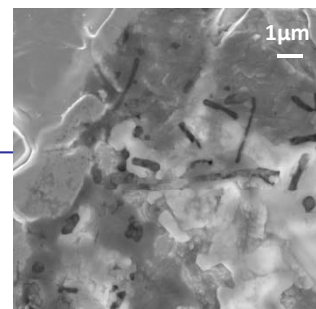

PBS

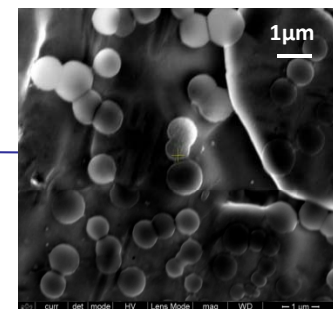

Water

Before sampling

**Sampling materials**  
Cotton vs. Nylon-flocked

Both flocked nylon and cotton swabs left behind detectable numbers of microbes on metal surfaces after sampling.

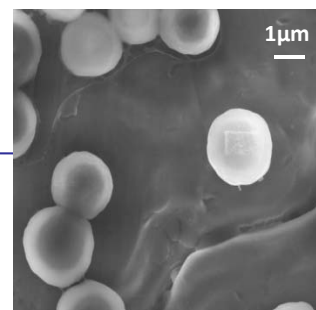

Cotton

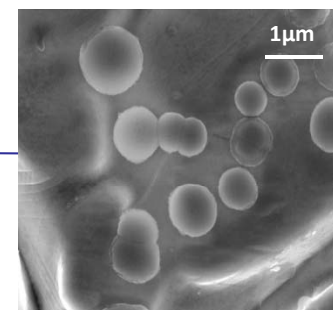

Nylon-flocked

After sampling
